# Supplementary material for: Protein arginine methyltransferase CARM1 attenuates the paraspeckle-mediated nuclear retention of mRNAs containing IRAlus
Source: PubMed Central journal article supplement — Genes Dev. 2015 Mar 15;29(6):630–45. doi: 10.1101/gad.257048.114 (PMC4378195; doi:10.1101/gad.257048.114), 2015-03-15
Supplement: supp_29.6.630_SuppMaterial.pdf [file supp_29.6.630_SuppMaterial.pdf]

## **Inventory of Supplemental Information**

### **I. Supplemental Figures**

Supplemental Figure S1-S2 is related to main Figure 1.

Supplemental Figure S3-S6 is related to main Figure 2.

Supplemental Figure S5 is related to main Figures 2, 4, 5, 7.

Supplemental Figure S7 is related to main Figure 3.

### **II. Supplemental Tables**

Supplemental Table S1 includes all primer sequences used in the study.

## Supplemental figure legends

**Figure S1. Characterization of p54<sup>nrb</sup> methylation (related to Figure 1).** (A) Identification of p54<sup>nrb</sup> methylation by PRMTs. The indicated PRMTs were used to methylate p54<sup>nrb</sup>. The methylated proteins were separated by SDS-PAGE, transferred to a PVDF membrane, and visualized by fluorography. The same membrane was subjected to Ponceau staining to verify substrate equal loading. (B) Characterization of p54<sup>nrb</sup> methylation by CARM1. Top, a schematic view of regions of p54<sup>nrb</sup> fused to his-tag for deletion analysis. Bottom, purified his-tagged p54<sup>nrb</sup> truncations were incubated with recombinant GST-CARM1 in the presence of [<sup>3</sup>H]AdoMet, separated by SDS-PAGE, and the methylated proteins visualized by fluorography (bottom right panel). A duplicate substrate gel was Coomassie stained to demonstrate loading (bottom left panel). Red dots indicated the expression of p54<sup>nrb</sup> truncations.

**Figure S2. p54<sup>nrb</sup> is methylated by CARM1 (related to Figure 1).** (A) CARM1 was knocked down in HeLa and HEK 293 cells, as validated by Western blotting (WB). Actin was used as a loading control. (B) Flag- p54<sup>nrb</sup> was expressing in scramble and CARM1 KD HeLa cells. The top is the silver staining of IP complex. The bottom is the western blotting analysis of IP efficiency. The Flag-p54<sup>nrb</sup> IP samples were subjected to MS. (C) The sequence of human p54<sup>nrb</sup>. Amino Acids highlighted by blue indicate the RRM domains, while Amino Acids highlighted by red indicate the Coiled-coil domain. All Arginines (R) were underscored. R73, R184 and R207 were present in both scramble and CARM1 knockdown Flag-p54<sup>nrb</sup> IP samples, while R357, R365 and R378 were present in the scramble, but not the CARM1 knockdown, Flag-p54<sup>nrb</sup> IP sample. (D) Hybrid mass spectrometry identified Arg357, Arg365 and Arg378 are major methylation sites on p54<sup>nrb</sup> by CARM1 in HeLa cells.

**Figure S3. CARM1 deficiency suppresses *egfp-IRAlus* expression (related to Figure 2).** (A) CARM1 KD suppresses EGFP expression of *egfp* mRNA containing *IRAlus* in its 3'-UTR. *IRAlus* and *Alu* from the 3'-UTR of *Lin28* were inserted into the 3'-UTR of *egfp* mRNA (Chen et al. 2008). Stable HeLa cell lines with the scramble shRNA treatment and CARM1 KD were transfected with the indicated plasmids and fluorescence observed 24 h after transfection. (B) The expression of EGFP and transcripts of *egfp* from the same batch of transfected HeLa cells as described (A) were investigated by WB by probing with anti-EGFP antibody; and by NB by probing with a Dig-labeled *egfp* fragment. Actin was used as loading control for WB. Equivalent amounts of total RNAs were loaded for NB as indicated by 28S and 18S rRNAs. (C) The relative translation efficiency (the relative intensity of each corresponding band from WB and NB shown in panel B) of *egfp-Alu* and *egfp-IRAlus* mRNA in scramble and CARM1 KD cells.

**Figure S4. CARM1 deficiency enhances nuclear retention of mRNAs containing *IRAlus* in HEK293 cells (related to Figure 2).** (A) CARM1 KD suppresses EGFP expression of *egfp* mRNA containing *IRAlus* in its 3'-UTR. *IRAlus* and *Alu* from the 3'-UTR of *Nicn1* were inserted into the 3'-UTR of *egfp* mRNA (Chen et al. 2008). Stable HEK293 cell lines with the scramble shRNA treatment and CARM1 KD were transfected with the indicated plasmids and fluorescence observed 24 h after transfection. (B) The expression of EGFP and transcripts of

*egfp* from the same batch of transfected HEK293 cells as described in (A) were investigated by WB by probing with anti-EGFP antibody. Actin was used as loading control for WB. (C) CARM1 deficiency significantly enhances the nuclear retention of *egfp* mRNA with *IRAlus*. The cytoplasmic and nuclear RNAs were isolated from HEK293 cells with the indicated treatment and then were used for RT-qPCR analysis. Note that the sub-cellular distributions of both the co-transfected *mcherry* and the endogenous *actin* mRNAs exhibited little changes in the scramble and CARM1 KD HEK293 cells. (D) CARM1 KD enhances the nuclear retention of other endogenous mRNAs with *IRAlus* in HEK293 cells. RT-qPCR analyzed a number of other endogenous mRNAs with *IRAlus* using nuclear and cytoplasmic fractionated RNAs. Primers to detect *IRAlus* RNAs were designed in the downstream of *IRAlus* in 3'-UTRs (Figure S5). The relative subcellular distribution of each *IRAlus* RNA was normalized to the relative amount of *malat1* RNA. In (C)(D), SD was obtained from three independent experiments. (\*) $P < 0.05$ ; (\*\*) $P < 0.01$ ;  $n = 3$ .

**Figure S5. A schematic drawing of transcripts containing a pair of *IRAlus* in their 3'-UTRs (related to Figures 2, 4, 5 and 7).** Black bars represent exons, thin black lines represent introns. The position and direction of *Alu* elements in 3'-UTRs were shown in white arrows. The primer set recognizing each transcript is labeled as a thick blue line underneath.

**Figure S6. CARM1 KD enhances the nuclear retention of endogenous mRNAs with *IRAlus* in their 3'-UTRs (related to Figure 2).** (A) RT-qPCR quantitations of endogenous mRNAs with *IRAlus* in total, cytoplasmic and nuclear fractionations. The level of each cellular mRNA was normalized to the level of *actin* mRNA in scramble and CARM1 KD HeLa cells. SD was obtained from three independent experiments. (\*) $P < 0.05$ ; (\*\*) $P < 0.01$ ;  $n = 3$ . T, total RNA; C, cytoplasmic RNAs; N, nuclear RNAs. (B) CARM1 KD promotes the nuclear retention of endogenous *icmt* mRNA. Top, cytoplasmic and nuclear RNA fractionation of scramble and CARM1 KD HeLa cells followed by NB to detect *icmt* mRNA. *tRNA<sup>lys</sup>* and *actin* revealed a successful cytoplasmic and nuclear fractionation. Equivalent amounts of RNA from different compartments were loaded as indicated by 28S and 18S rRNAs. Bottom, the relative subcellular distribution of the *icmt* mRNA was quantified from top panels by Image J and was presented by the normalization to the *actin* mRNA in each subcellular compartment.

**Figure S7. Visualization of *mcherry-IRAlus* expression after *p54<sup>nrb</sup>* and CARM1 knockdown (related to Figure 3).** (A) While CARM1 KD suppresses *mcherry* expression of *mcherry* mRNA containing *IRAlus* in its 3'-UTR, knockdown of *p54<sup>nrb</sup>* enhances *mcherry* expression of the same plasmid. (B) Expression of WT CARM1 but not the catalytic inactive mutant E266Q CARM1 in CARM1 KD HeLa cells could rescue the expression of *mcherry* mRNAs with *IRAlus* in its 3'-UTR. (C) A schematic drawing for the nuclear retention regulation of *mcherry* mRNAs with *IRAlus* in its 3'-UTR under different conditions. See text for details.

Supplemental figures

Hu\_FigS1

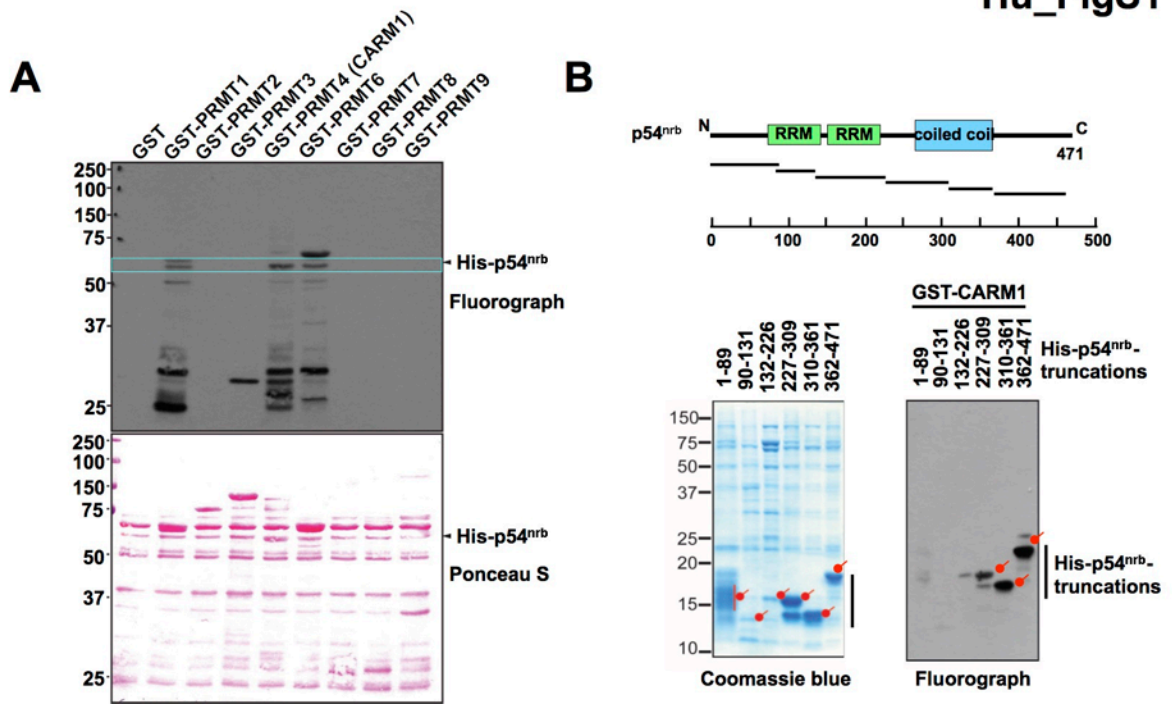

**A**

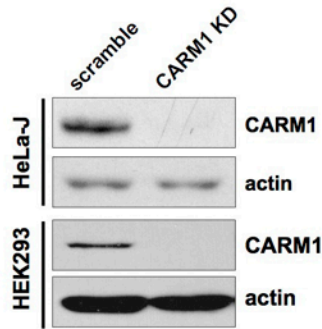

**B**

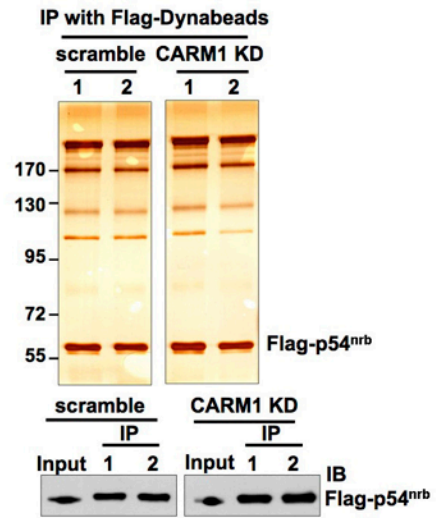

**C**

MQSNKTFNLEKQNHTRPKHHQHQQHQQHQQQQQPPPPPIANGQQASSQNEGLTIDLKNFRKPGKFTTQRSLRF  
 VGNLPPDITEEEMRKLFEKYGKAGEVFIHKDKGFGFIRLETRTLAEIAKVELDNMPLRGKQLRVRFACHSASLTVRNLPQY  
 VSNELLEAFSVFGQVERAVVIVDDRGRPSGKGVFVSGKPAARKALDRCSSEGSFLLTTFPRPVTVPEMDQLDDEEGLPEK  
 LVIKNQQFHKEREQPPRFAQPGSFYEYAMRWKALIEMEKQQDQVDRNIKEAREKLEMEMEAREHEHQVMLMRQD  
 LMRRQEELRRMEELHNQEVQKRKQLELRQEEERRRFEEMRRQEEEMMRQQEGFKGTFPDAREQEIRMGQMAM  
 GGAMGINNRGAMPPAPVPAGTPAPPGPATMMPDGLTGLTPPTTERFGQAATMEGIGAIGGTPPAFNRRAAPGAEFAPN  
 KRRRY

R73 me  
 R184 me  
 R207 me  
 R357 me  
 R365 me  
 R378 me

**D**

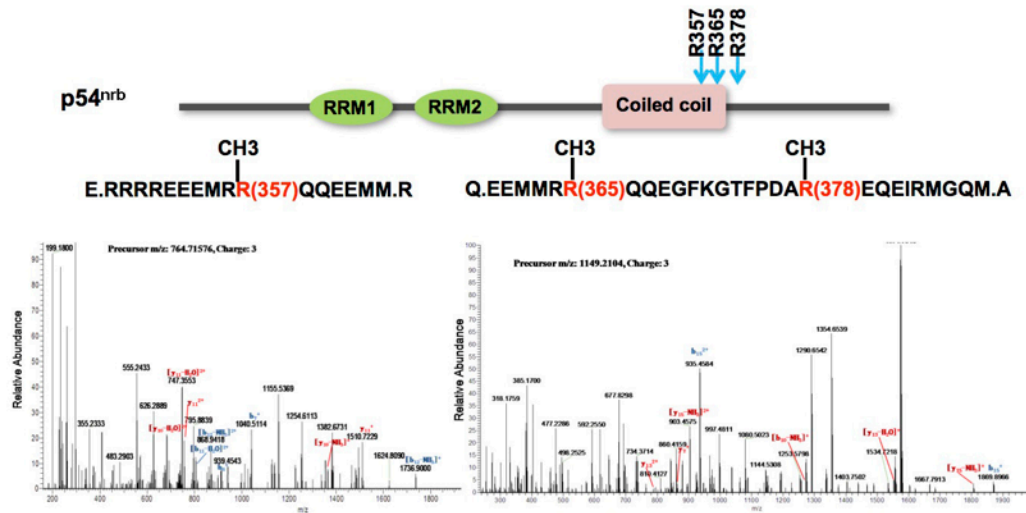

# Hu\_FigS3

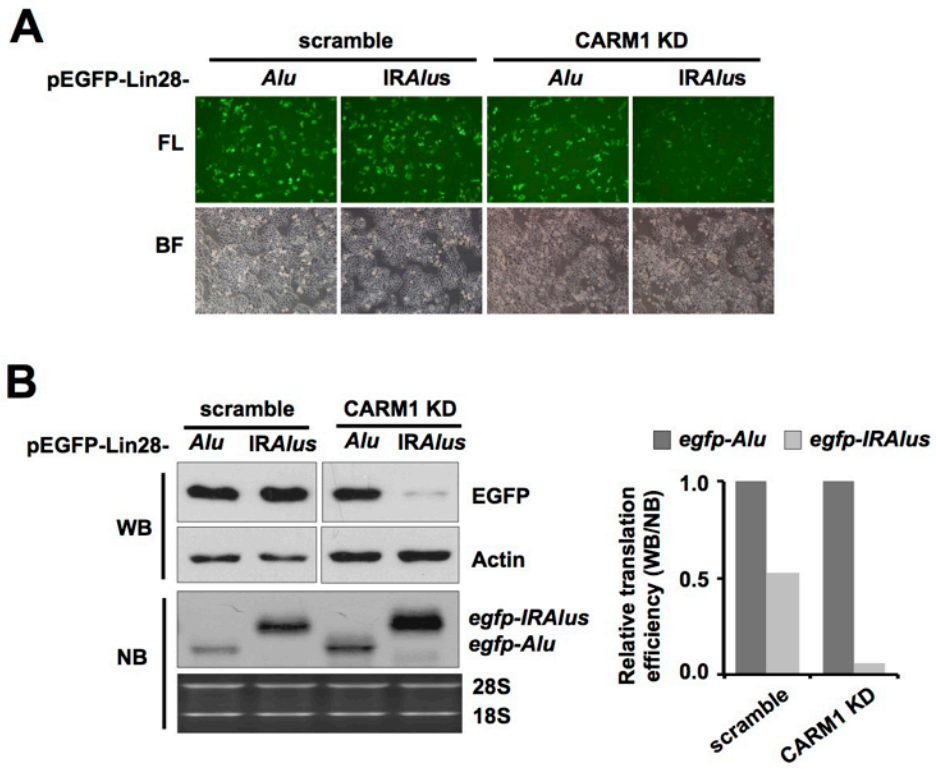

# Hu\_FigS4

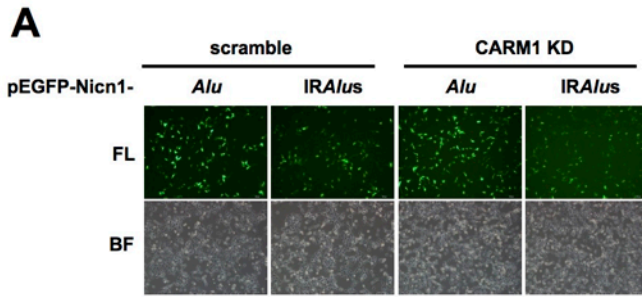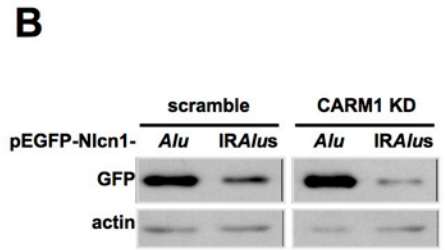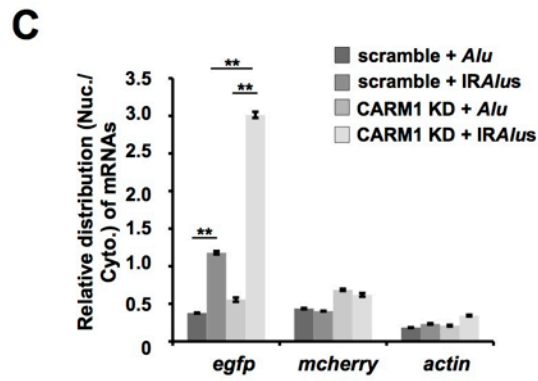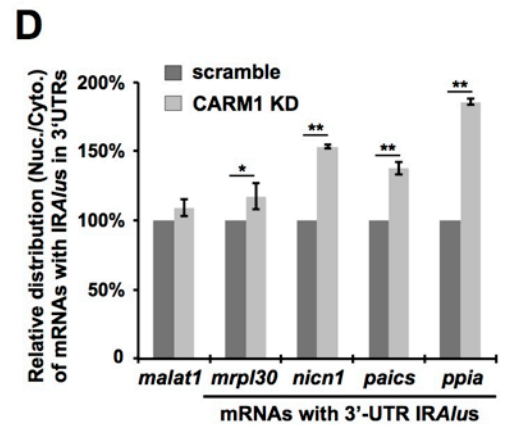

# Hu\_FigS5

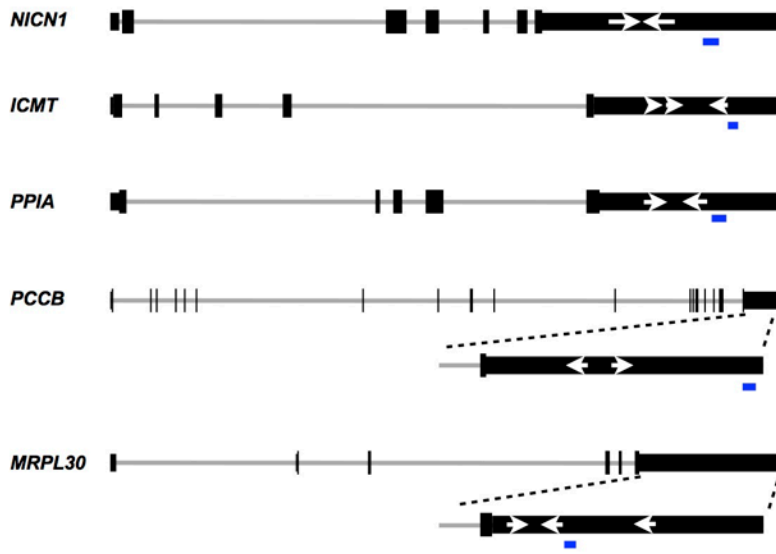



# Hu\_FigS6

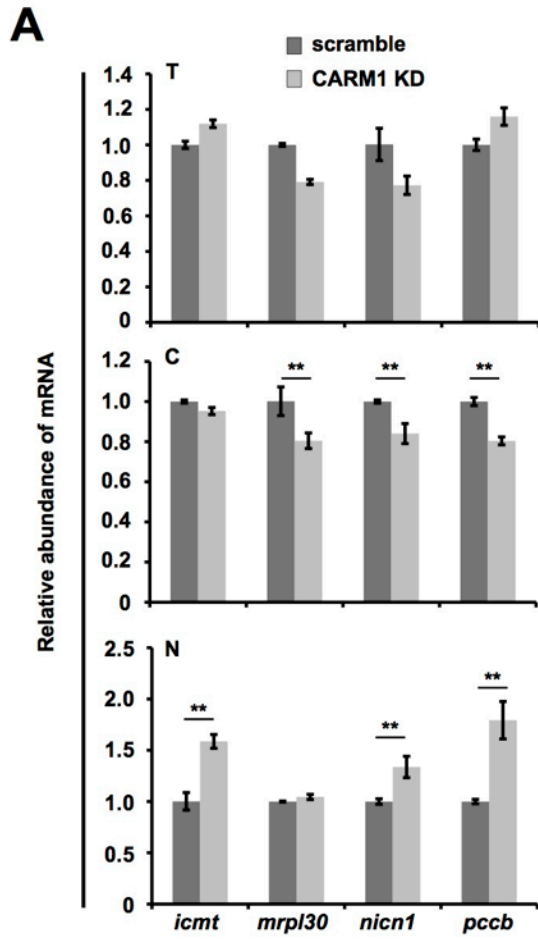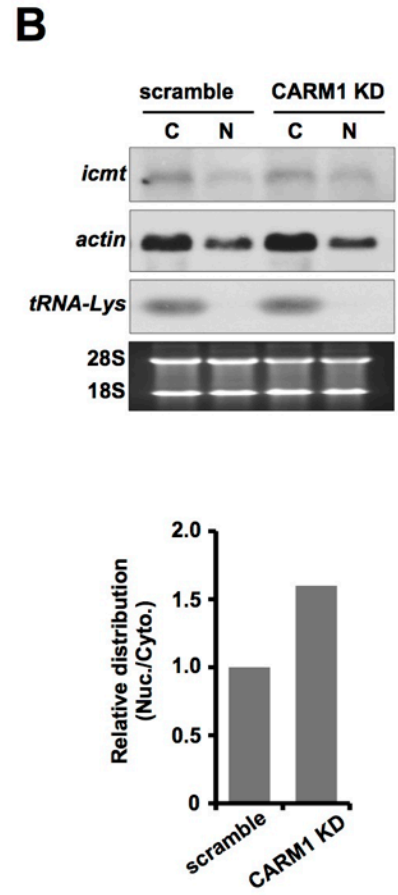

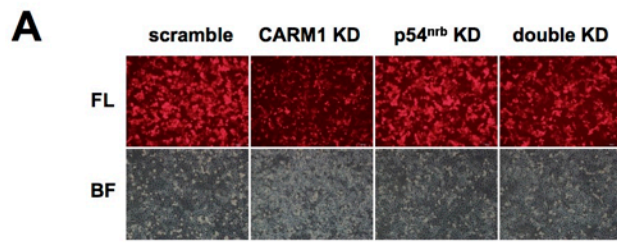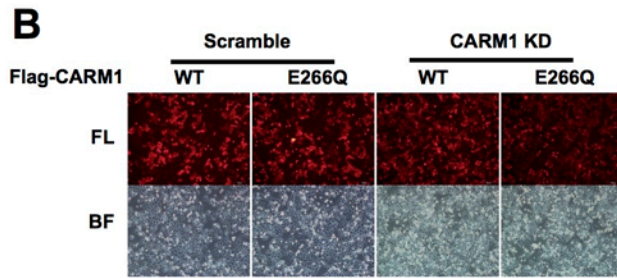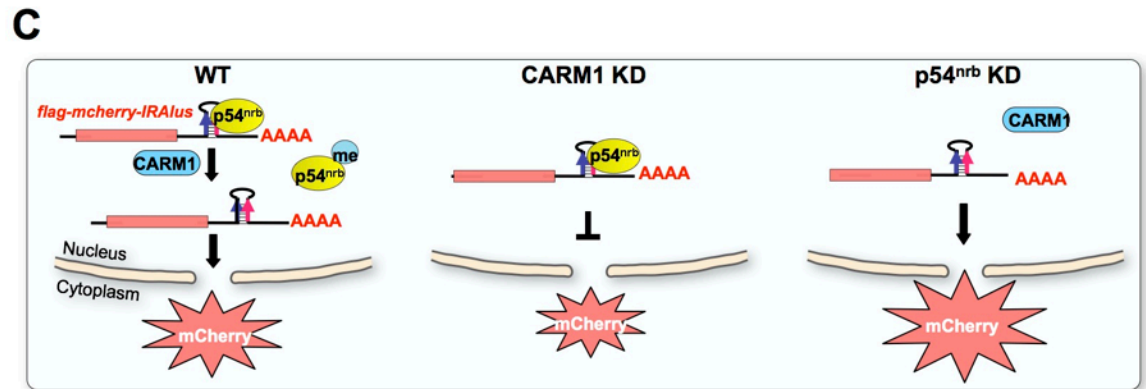

**Supplemental Table S1. Primers used in this study.**

| <b>qPCR primers for IRAlus Genes</b> |                         |
|--------------------------------------|-------------------------|
| qNicn1-F                             | ACTTCATCTGCAAGGTCACTTAC |
| qNicn1-R                             | ACAGTAGTCTGTCCCTCATGTGG |
| qPAICS-F                             | CGTAATTTTGGACTGCCACA    |
| qPAICS-R                             | AGGTTTCATGGACAGCGAAC    |
| qPccb-F                              | CGGTGTACAGCATCTGTTGG    |
| qPccb-R                              | CATCTCTGCCAAAACCACA     |
| qMRPL30-F                            | GTGAGTGGCTCTTTGCATGA    |
| qMRPL30-R                            | AGCTGGCATCCAGTGTTTCT    |
| qICMT-F                              | CCTCACGAAAGGCTTCACTC    |
| qICMT-R                              | GGCCACATCACCAATTTTCT    |
| qPPIA-F                              | AGGGAAGCATATTGGGCTTT    |
| qPPIA-R                              | CCTCTGCAGGGAGACTGACT    |

| <b>qPCR primers for NEAT1</b> |                            |
|-------------------------------|----------------------------|
| qNEAT1-F                      | TCGGGTATGCTGTTGTGAAA       |
| qNEAT1-R                      | TGACGTAACAGAATTAGTTCTTACCA |
| qNEAT1-up-3F                  | GCAGTGATCAAACAAGGCTTC      |
| qNEAT1-up-3R                  | TCAGTGTCCCTTAGGCTCAA       |
| qNEAT1-up-2F                  | ACGGCCTCTTCCCCTTAAT        |
| qNEAT1-up-2R                  | AGGCATCGTGGTTTTGACTC       |
| qNEAT1-up-1F                  | CAACAACATCCGGGAAGAAA       |
| qNEAT1-up-1R                  | CAGTGTATCCCCGCTTCTCT       |
| qNEAT1-1F                     | GGAGGGCCGGGAGGGCTAAT       |
| qNEAT1-1R                     | CGGTCAGCCCCGTCGAGCTA       |
| qNEAT1-2F                     | TCCTCCTGGTGGCCAAGACAGC     |
| qNEAT1-2R                     | GCTAAGGGGCAGCGAAGGATGC     |
| qNEAT1-3F                     | TTCTTCCCCTTTACAGCACA       |
| qNEAT1-3R                     | TCGTTATGAAGGCAATGTGA       |
| qNEAT1-4F                     | GCCACATTCTTTGCCTTCAT       |
| qNEAT1-4R                     | CCCACACCTCTGGAAATTCA       |
| qhNEAT1_2-F(qNEAT1-5F)        | TGACTCTCCATTTCCCCTATC      |
| qhNEAT1_2-R(qNEAT1-5R)        | TCATTTACCCGCATTTTACA       |
| qNEAT1-6F                     | GCATTTTTCTCTTTGACCA        |
| qNEAT1-6R                     | GTGCTTTTTGCACCAACAAT       |
| qhNEAT1_2-F-2(qNEAT1-7F)      | TTGCAGCAACTGTCCTGAAG       |
| qhNEAT1_2-R-2(qNEAT1-7R)      | GGGTCCGGGATTATAGAGGA       |
| qNEAT1-8F                     | GCCTGTTGTCCTTACACCAT       |
| qNEAT1-8R                     | TAGGGCTTCCCTTCGCTATT       |
| qNEAT1-9F                     | GGGGTGTCCCCTATCAGACT       |
| qNEAT1-9R                     | AATGCTTTCCCATGATCCAG       |

|            |                      |
|------------|----------------------|
| qNEAT1-10F | GCCATCCGAGGAAGATGTAA |
| qNEAT1-10R | GGGATGTTGATGGAGTGACC |
| qNEAT1-11F | CCCACCTGGTAGTCCTCAGA |
| qNEAT1-11R | TGGGTGCCTTCTACTCATCC |

|                           |                        |
|---------------------------|------------------------|
| <b>Other qPCR primers</b> |                        |
| qGFP-F                    | ACAAGCAGAAGAACGGCATC   |
| qGFP-R                    | ACTGGGTGCTCAGGTAGTGG   |
| qmcherry-F                | CCCCGTAATGCAGAAGAAGA   |
| qmcherry-R                | GGCCTTGTAGGTGGTCTTGA   |
| qhIFN $\beta$ -F          | CAGCAGTTCCAGAAGGAGGA   |
| qhIFN $\beta$ -R          | AGCCAGGAGGTTCTCAACAA   |
| qACTB-F                   | GGACTTCGAGCAAGAGATGG   |
| qACTB-R                   | AGCACTGTGTTGGCGTACAG   |
| qACTB for ChIP and NRO F  | CCTCATGGCCTTGTACACAGAG |
| qACTB for ChIP and NRO R  | GCCCTTTCTCACTGGTTCTCT  |
| qnucleolin-F              | CCTCAGCAAAGAAGGTGGTC   |
| qnucleolin-R              | GCCAGGTGTGGTAACTGCTT   |

|                              |                                                                 |
|------------------------------|-----------------------------------------------------------------|
| <b>Primers for NB probes</b> |                                                                 |
| F-Sp6-NICN1-upstream         | GCGATTTAGGTGACACTATAGGACCTTTCCCAAG<br>TGGCTCT                   |
| R-T7-NICN1-upstream          | GCGTAATACGACTCACTATAGGGACCACTAGGGG<br>ACACACAGG                 |
| F-Sp6-actin                  | GCGATTTAGGTGACACTATAGTGCTATCCCTGTAC<br>GCCTCT                   |
| R-T7-actin                   | GCGTAATACGACTCACTATAGGGAGTACTTGCGC<br>TCAGGAGGA                 |
| F-tRNA-Lys                   | GATCCGCCCGGATAGCTCAGTCGGTAGAGCATCA<br>GCTTTTAATCTGAGGGTCCAGGG   |
| R-tRNA-Lys                   | AGCTTCGCCCGAACAGGGACTTGAACCCTGGAC<br>CCTCAGATTAAAAGTCTGATGCTCTA |
| F-NEAT1                      | GGGCCATCAGCTTTGAATAA                                            |
| R-T7-NEAT1                   | TGAATTGTAATACGACTCACTATAGGGTCCCCATA<br>CATGCGTGACTA             |

|                                |                                                 |
|--------------------------------|-------------------------------------------------|
| <b>Biotin Pulldown primers</b> |                                                 |
| F-T7-GFP                       | GCGTAATACGACTCACTATAGGGATGGTGAGCAA<br>GGGCGAGGA |
| R-GFP                          | TTATCTAGATCCGGTGGATC                            |
| F-T7-dsEGFP                    | GCGTAATACGACTCACTATAGGGCACAAGTTCAG<br>CGTGTCCG  |

|             |                                                |
|-------------|------------------------------------------------|
| R-T7-dsEGFP | GCGTAATACGACTCACTATAGGGGTTACCTTGAT<br>GCCGTTCC |
|-------------|------------------------------------------------|

|                                 |                                                   |
|---------------------------------|---------------------------------------------------|
| <b>Dig-RNA Pulldown primers</b> |                                                   |
| F-T7-IRAlus                     | GCGTAATACGACTCACTATAGGGGCACGTGTCTCT<br>AGCAAAAACC |
| R-IRAlus                        | ATGCTGAGCATATCTCTTGG                              |

| Plasmid                                  | Vector           | Insert                                       | Restriction enzyme |
|------------------------------------------|------------------|----------------------------------------------|--------------------|
| pcDNA3.1(+)-flag                         | pcDNA3.1(+)      | flag                                         | HindII BamHI       |
| pcDNA3.1(+)-flag-p54 <sup>nrb</sup> -wt  | pcDNA3.1(+)-flag | full length p54 <sup>nrb</sup>               | BamHI XhoI         |
| pcDNA3.1(+)-flag-p54 <sup>nrb</sup> -mut | pcDNA3.1(+)-flag | R357,365,378K mutation of p54 <sup>nrb</sup> | BamHI XhoI         |
| pcDNA3.1(+)-flag-EGFP                    | pcDNA3.1(+)-flag | EGFP                                         | BamHI XhoI         |
| pTracer-CARM1-WT                         | pTracer          | WT CARM1                                     | EcoRI NotI         |
| pTracer-CARM1-E266Q                      | pTracer          | E266Q mutation of CARM1                      | EcoRI NotI         |
| pmCherry-flag-IRAlus                     | pmCherry-C1      | IRAlus from pEGFP-C1-Nicn1-IRAlus            | EcoRI XhoI         |
| pcDNA3.1(+)-flag-p54 <sup>nrb</sup> -1   | pcDNA3.1(+)-flag | 1-230bp of p54 <sup>nrb</sup>                | BamHI XhoI         |
| pcDNA3.1(+)-flag-p54 <sup>nrb</sup> -2   | pcDNA3.1(+)-flag | 54-375bp of p54 <sup>nrb</sup>               | BamHI XhoI         |
| pET28a-p54 <sup>nrb</sup>                | pET28a           | full length                                  | BamHI EcoRI        |
| pET28a-p54 <sup>nrb</sup> -△1            | pET28a           | 1-89bp of p54 <sup>nrb</sup>                 | BamHI EcoRI        |
| pET28a-p54 <sup>nrb</sup> -△2            | pET28a           | 90-131bp of p54 <sup>nrb</sup>               | BamHI EcoRI        |
| pET28a-p54 <sup>nrb</sup> -△3            | pET28a           | 132-226bp of p54 <sup>nrb</sup>              | BamHI EcoRI        |
| pET28a-p54 <sup>nrb</sup> -△4            | pET28a           | 227-309bp of p54 <sup>nrb</sup>              | BamHI EcoRI        |
| pET28a-p54 <sup>nrb</sup> -△5            | pET28a           | 310-361bp of p54 <sup>nrb</sup>              | BamHI EcoRI        |
| pET28a-p54 <sup>nrb</sup> -△6            | pET28a           | 362-471bp of p54 <sup>nrb</sup>              | BamHI EcoRI        |
| pET28a-p54 <sup>nrb</sup> -R357,365K     | pET28a           | R357,365K mutation of p54 <sup>nrb</sup>     | BamHI EcoRI        |
| pET28a-p54 <sup>nrb</sup> -R378,383K     | pET28a           | R378,383K mutation of p54 <sup>nrb</sup>     | BamHI EcoRI        |
